# Supplementary material
Source: PubMed Central journal article supplement (PMC3096782)
Supplement: NIHMS281800-supplement-1_si_001.pdf [file NIHMS281800-supplement-1_si_001.pdf]

## Supporting information

### Design of novel neurokinin 1 receptor antagonists based on conformationally constrained aromatic amino acids and discovery of a potent chimeric opioid agonist- neurokinin 1 receptor antagonist.

Steven Ballet,<sup>1</sup> Debby Feytens,<sup>1</sup> Koen Buysse,<sup>1</sup> Nga N. Chung,<sup>2</sup> Carole Lemieux,<sup>2</sup> Suneeta Tumati,<sup>3</sup> Attila Keresztes,<sup>3</sup> Joost Van Duppen,<sup>4</sup> Josephine Lai,<sup>3</sup> Eva Varga,<sup>3</sup> Frank Porreca,<sup>3</sup> Peter W. Schiller,<sup>2</sup> Jozef Vanden Broeck<sup>4</sup> and Dirk Tourwé.<sup>1</sup>

<sup>1</sup> *Department of Organic Chemistry, Vrije Universiteit Brussel, Brussels, Belgium,*

<sup>2</sup> *Department of Chemical Biology and Peptide Research, Clinical Research Institute, Montreal, Canada,*

<sup>3</sup> *Department of Pharmacology, University of Arizona, Tucson, AZ, U.S.A.,*

<sup>4</sup> *Animal Physiology and Neurobiology, Zoological Institute, Katholieke Universiteit Leuven, Leuven, Belgium.*

#### Content

S2-S6: Non-key compound characterization

S7: Figure **S1**: SP-induced aequorin luminescence in the presence of antagonists **19**, **20** and **23**

#### *Corresponding author*

Dr. Steven Ballet

Department of Organic Chemistry

Vrije Universiteit Brussel

Pleinlaan 2, B-1050 Brussels, BELGIUM

Tel.: +32-2-6293298

Fax: +32-2-6293304

Email: sballet@vub.ac.be

## Non-key compound characterization

**Phth-(1R)-phenyl-(4S)-Aba-Gly-OH 13:** Saponification yielded the desired compound (white solid, 98% from ethyl ester.<sup>31</sup> HPLC (standard gradient):  $t_{\text{Ret}}$  15.5 min; TLC  $R_f$  (EtOAc/MeOH 4:1): 0.73; MS (ESP+) found  $m/z$  441.3  $[M + H]^+$ ,  $C_{26}H_{20}N_2O_5$  requires 440.14,  $^1H$  NMR 250 MHz ( $CDCl_3$ ):  $\delta$  7.86 (m, 2H), 7.72 (m, 2H), 7.56-7.13 (m, 9H), 5.68 (s, 1H), 5.07 (d, 1H,  $J = 17.4$  Hz), 4.87 (dd, 1H,  $J_1 = 13.0$  Hz,  $J_2 = 3.0$  Hz), 3.77 (t, 1H,  $J = 13.2$  Hz), 3.66 (d, 1H,  $J = 17.1$  Hz), 2.51 (dd, 1H,  $J_1 = 14.0$  Hz,  $J_2 = 3.0$  Hz);  $^{13}C$  NMR ( $CDCl_3$ )  $\delta$  172.7, 170.6, 138.8, 138.5, 136.8, 134.2, 131.9, 130.5, 129.9, 129.8, 128.7, 127.8, 127.6, 126.4, 123.6, 70.4, 53.6, 53.0, 34.1.

**Phth-(1R)-phenyl-(4R)-Aba-Gly-OH 14:** Saponification yielded the desired compound (white solid, 98% from ethyl ester.<sup>31</sup> HPLC (standard gradient):  $t_{\text{Ret}}$  15.6 min; TLC  $R_f$  (EtOAc/MeOH 4:1): 0.73; MS (ESP+) found  $m/z$  441.3  $[M + H]^+$ ,  $C_{26}H_{20}N_2O_5$  requires 440.14,  $^1H$  NMR 250 MHz ( $CDCl_3$ ):  $\delta$  7.75 (m, 2H), 7.67 (m, 2H), 7.48-7.09 (m, 9H), 5.67 (s, 1H), 5.27 (dd, 1H,  $J_1 = 10.3$  Hz,  $J_2 = 4.4$  Hz), 4.85 (d, 1H,  $J = 16.7$  Hz), 4.23 (d, 1H,  $J = 17.0$  Hz), 3.91 (dd, 1H,  $J_1 = 17.1$ ,  $J_2 = 10.6$  Hz), 3.16 (dd, 1H,  $J_1 = 17.0$  Hz,  $J_2 = 4.4$  Hz);  $^{13}C$  NMR ( $CDCl_3$ )  $\delta$  171.5, 170.8, 170.7, 140.2, 135.3, 135.1, 134.2, 134.1, 131.3, 130.8, 129.2, 128.7, 128.1, 126.8, 126.2, 123.5, 69.5, 53.2, 52.3, 33.3.

**Ac-(1R)-1-phenyl-(4S)-Aba-Gly-NH-3',5'-(CF<sub>3</sub>)<sub>2</sub>-Bn 15:** Preparative HPLC yielded the desired compound (white powder, 52%). HPLC (standard gradient):  $t_{\text{Ret}}$  17.14 min; TLC  $R_f$  (EtOAc): 0.24; MS (ESP+) found  $m/z$  578.2  $[M + H]^+$ ,  $C_{29}H_{25}F_6N_3O_3$  requires 577.18,  $^1H$  NMR 250 MHz ( $CDCl_3$ ):  $\delta$  7.78 (s, 1H), 7.68 (s, 2H), 7.42-7.04 (m, 12H), 6.83 (br s, 1H), 6.48 (d, 1H,  $J = 4.6$  Hz), 5.81 (s, 1H), 5.31 (s, 2H), 4.95 (d, 1H,  $J = 15.2$  Hz), 4.54-4.34 (m, 1H), 3.72 (d, 1H,  $J = 14.2$  Hz), 3.01 (t, 1H,  $J = 13.3$  Hz), 2.86 (m, 1H), 2.05 (s, 3H).  $^{13}C$  NMR ( $CDCl_3$ )  $\delta$  173.6, 170.7, 168.8, 140.7, 138.8, 137.9, 137.2, 132.0, 130.7, 129.9, 129.6, 129.2, 128.9, 127.9, 127.4, 126.7, 126.1, 121.6, 69.9, 55.5, 55.4, 42.6, 35.0, 23.0.

**Ac-(1R)-1-phenyl-(4S)-Aba-Gly-NMe-3',5'-(CF<sub>3</sub>)<sub>2</sub>-Bn 16:** Preparative HPLC yielded the desired compound (white powder, 40%). HPLC (standard gradient):  $t_{\text{Ret}}$  17.53 min; TLC  $R_f$  (EtOAc): 0.18; MS (ESP+) found  $m/z$  592  $[M + H]^+$ ,  $C_{30}H_{27}F_6N_3O_3$  requires 591.20,  $^1H$  NMR 250 MHz ( $CDCl_3$ ):  $\delta$  7.79 (s, 1H), 7.69 (s, 2H), 7.44-7.19

(m, 9H), 6.85 (d, 1H,  $J = 5.4$  Hz), 5.86 (s, 1H), 5.19 (d, 1H,  $J = 16.4$  Hz), 4.68 (s, 2H), 4.35 (m, 1H), 3.72 (d, 1H,  $J = 15.7$  Hz), 3.16 (t, 1H,  $J = 13.3$  Hz), 3.00 (s, 3H), 2.95 (m, 1H), 2.07 (s, 3H).  $^{13}\text{C}$  NMR ( $\text{CDCl}_3$ )  $\delta$  172.9, 171.1, 168.5, 139.5, 138.1, 137.3, 132.3, 131.7, 130.2, 130.0, 129.4, 128.7, 128.0, 127.6, 127.2, 126.7, 126.4, 121.6, 69.8, 55.3, 51.4, 51.0, 35.1, 34.9, 23.0

**Ac-(1R)-1-phenyl-(4R)-Aba-Gly-NMe-3',5'-(CF<sub>3</sub>)<sub>2</sub>-Bn 17:** Preparative HPLC yielded the desired compound **17** (white powder, 49%). HPLC (standard gradient):  $t_{\text{Ret}}$  17.70 min; TLC  $R_f$  (EtOAc): 0.35; MS (ESP+) found  $m/z$  592  $[\text{M} + \text{H}]^+$ ,  $\text{C}_{30}\text{H}_{27}\text{F}_6\text{N}_3\text{O}_3$  requires 591.20,  $^1\text{H}$  NMR 250 MHz ( $\text{CDCl}_3$ ):  $\delta$  7.85 (s, 1H), 7.70 (s, 2H), 7.44-7.09 (m, 9H), 6.70 (d, 1H), 5.71 (s, 1H), 4.86 (m, 1H), 4.92 (d, 1H,  $J = 16.0$  Hz), 4.76 (d, 1H,  $J = 16.0$  Hz), 4.49 (d, 1H,  $J = 15.2$  Hz), 4.38 (d, 1H,  $J = 15.2$  Hz), 3.41 (dd, 1H,  $J_1 = 17.5$  Hz,  $J_2 = 4.9$  Hz), 2.92 (m, 1H), 3.03 (s, 3H), 1.93 (s, 3H).  $^{13}\text{C}$  NMR ( $\text{CDCl}_3$ )  $\delta$  172.5, 169.3, 168.4, 141.2, 139.4, 135.5, 134.1, 132.3, 131.9, 130.7, 129.1, 128.4, 128.0, 126.4, 121.4, 69.0, 52.5, 50.9, 49.7, 36.1, 35.0, 23.0

**Boc-Tic-NH-3',5'-(CF<sub>3</sub>)<sub>2</sub>-Bn:** After flash chromatography (EtOAc/Hexane 1:1) the desired compound was obtained (yellow solid, 90%). HPLC (standard gradient):  $t_{\text{Ret}}$  18.96 min; TLC  $R_f$  (EtOAc/hexane 1:1): 0.82; MS (ESP+) found  $m/z$  503  $[\text{M} + \text{H}]^+$ ,  $\text{C}_{24}\text{H}_{24}\text{F}_6\text{N}_2\text{O}_3$  requires 502.17,  $^1\text{H}$  NMR 250 MHz ( $\text{CDCl}_3$ ):  $\delta$  7.72 (s, 1H), 7.48 (s, 2H), 7.24-7.11 (m, 4H), 4.77 (m, 1H), 4.60-4.18 (m, 4H), 3.31 (m, 1H), 3.09 (m, 1H), 1.44 (s, 9H).  $^{13}\text{C}$  NMR ( $\text{CDCl}_3$ )  $\delta$  172.3, 155.2, 140.6, 133.6, 132.1, 131.6, 129.3, 127.9, 127.6, 127.0, 126.9, 126.0, 121.3, 81.6, 45.2, 45.0, 42.7, 38.8, 28.4

**Ac-Tic-NH-3',5'-(CF<sub>3</sub>)<sub>2</sub>-Bn 22:** Compound **22** was purified by preparative HPLC (white powder, 90%). HPLC (standard gradient):  $t_{\text{Ret}}$  16.29 min; TLC  $R_f$  (EtOAc/hexane 1:1): 0.12; MS (ESP+) found  $m/z$  445  $[\text{M} + \text{H}]^+$ ,  $\text{C}_{21}\text{H}_{18}\text{F}_6\text{N}_2\text{O}_2$  requires 444.13,  $^1\text{H}$  NMR 250 MHz ( $\text{CDCl}_3$ ):  $\delta$  7.72 (br s, 1H, NH), 7.39 (s, 1H), 7.54 (s, 2H), 7.30-7.08 (m, 4H), 5.12 (t, 1H,  $J = 6.0$  Hz), 4.60-4.46 (m, 3H), 4.33 (d, 1H,  $J = 6.0$  Hz), 3.37 (dd, 1H,  $J_1 = 15.4$  Hz,  $J_2 = 5.6$  Hz), 3.04 (m, 1H,  $J_1 = 16.0$  Hz,  $J_2 = 6.5$  Hz), 2.28 (s, 3H).  $^{13}\text{C}$  NMR ( $\text{CDCl}_3$ )  $\delta$  172.9, 171.2, 140.8, 133.4, 132.1, 131.5, 128.3, 128.2, 127.9, 127.4, 127.1, 125.7, 121.3, 53.9, 47.3, 42.5, 30.4, 21.9

**Boc-(4S/R)-Aia-Gly-OMe 26a/b:** After flash chromatography (EtOAc/*c*-hexane 1:4) the desired compound was obtained with a yield of 33% (yellow foam). HPLC (standard gradient):  $t_{\text{Ret}}$  13.93 min; TLC  $R_f$  ( $\text{CH}_2\text{Cl}_2$ :EtOAc 1:1): 0.4; MS (ESP+) found  $m/z$  388  $[\text{M}+\text{H}]^+$ , 332  $[\text{M}+2\text{H}-t\text{-Bu}]^+$ , 288  $[\text{M}+2\text{H}-\text{Boc}]^+$ ,  $\text{C}_{20}\text{H}_{25}\text{N}_3\text{O}_5$  requires 387.2,  $^1\text{H}$  NMR 250 MHz ( $\text{CDCl}_3$ ):  $\delta$  8.05 (s, 1H) 7.26-7.37 (M, 4H), 5.91 (d, 1H,  $J=7.3$  Hz), 5.12-5.18 (m, 1H), 5.26 (d, 1H,  $J=17.1$  Hz), 4.57 (d, 1H,  $J=17.5$  Hz), 4.04 (d, 1H,  $J=2.5$  Hz), 3.97 (d, 1H,  $J=3.3$  Hz), 3.68 (s, 3H), 3.32 (dd, 1H,  $J_1=13.6$  Hz,  $J_2=2.1$  Hz), 2.82 (t, 1H,  $J=14.1$  Hz), 1.48 (s, 9H).  $^{13}\text{C}$  NMR 63 MHz ( $\text{CDCl}_3$ )  $\delta$  173.1, 169.6, 155.0, 139.4, 134.7, 132.2, 131.8, 128.5, 127.8, 127.6, 122.9, 121.6, 120.8, 120.0, 118.4, 110.6, 109.8, 79.9, 52.4, 51.1, 50.1, 46.4, 29.7, 28.9

**Boc-(4S/R)-Aia-Gly-NMe-3',5'-(CF<sub>3</sub>)<sub>2</sub>Bn 27a/b:** After flash chromatography (EtOAc/*c*-hexane 1:4) the desired compound was obtained with a yield of 83% (yellow foam). HPLC (standard gradient):  $t_{\text{Ret}}$  19.33 min; TLC  $R_f$  (EtOAc): 0.47; MS (ESP+) found  $m/z$  613  $[\text{M}+\text{H}]^+$ ,  $\text{C}_{29}\text{H}_{30}\text{F}_6\text{N}_4\text{O}_4$  requires 612.2,  $^1\text{H}$  NMR 250 MHz ( $\text{CDCl}_3$ )  $\delta$  8.22 (s, 1H), 7.03-7.79 (M, 7H), 5.92 (d, 1H,  $J=6.9$  Hz), 5.26 (d, 1H,  $J=17.1$  Hz), 5.10-5.20 (m, 1H), 4.72 (d, 1H,  $J=17.5$  Hz), 4.70 (d, 1H,  $J=15.6$  Hz), 4.46 (d, 1H,  $J=15.6$  Hz), 4.18 (d, 1H,  $J=17.3$  Hz), 4.10 (d, 1H,  $J=16.3$  Hz), 3.34 (dd, 1H,  $J_1=15.8$  Hz,  $J_2=2.3$  Hz) 2.92 (s, 3H), 2.82 (t, 1H,  $J=14.1$  Hz), 1.48 (s, 9H).  $^{13}\text{C}$  NMR 63 MHz ( $\text{CDCl}_3$ )  $\delta$  28.4, 29.1, 34.9, 46.2, 49.9, 50.8, 51.1, 79.8, 139.3, 134.7, 132.3, 131.8, 128.5, 127.9, 127.6, 122.8, 121.7, 120.8, 120.1, 118.4, 110.7, 109.8, 155.2, 168.7, 173.1

**Boc-(4S/R)-Tcc-NMe-3',5'-(CF<sub>3</sub>)<sub>2</sub>Bn 31a/b:** After flash chromatography (EtOAc/*c*-hexane 1:4) the desired compound was obtained with a yield of 78% (yellow foam). HPLC (standard gradient):  $t_{\text{Ret}}$  20.33 min; TLC  $R_f$  (EtOAc): 0.62; MS (ESP+) found  $m/z$  556  $[\text{M}+\text{H}]^+$ , 456  $[\text{M}-\text{Boc}]^+$ ,  $\text{C}_{27}\text{H}_{27}\text{F}_6\text{N}_3\text{O}_3$  requires 555.2,  $^1\text{H}$  NMR 250 MHz ( $\text{CDCl}_3$ )  $\delta$  7.96 (s, 1H), 7.77 (s, 1H), 7.62 (s, 2H), 7.25-7.47 (M, 5H), 4.88-4.92 (m, 3H), 4.86 (s, 2H), 4.32 (d, 1H,  $J=15.3$  Hz), 3.25-3.30 (m, 1H), 3.17 (s, 3H), 3.13-3.17 (m, 1H), 2.02 (s, 9H).  $^{13}\text{C}$  NMR X MHz ( $\text{CDCl}_3$ )  $\delta$  173.5, 155.3, 136.5, 128.2, 127.5, 126.8, 126.4, 124.1, 122.4, 121.9, 121.6, 119.8, 117.8, 111.0, 104.4, 50.8, 49.6, 41.6, 35.3, 28.3, 22.9

**Boc-(4S)-Aia-3',5'-(CF<sub>3</sub>)<sub>2</sub>Bn 29:** After flash chromatography (EtOAc/*c*-hexane 1:3) the desired compound was obtained with a yield of 42% (yellow foam). HPLC (standard gradient):  $t_{\text{Ret}}$  19.38 min; TLC  $R_f$  (EtOAc:*c*-hexane 1:3): 0.17; MS (ESP+) found  $m/z$  542  $[\text{M}-t\text{Bu}+\text{H}]^+$ , C<sub>27</sub>H<sub>27</sub>F<sub>6</sub>N<sub>3</sub>O<sub>3</sub> requires 555.2, <sup>1</sup>H NMR 250 MHz (CDCl<sub>3</sub>)  $\delta$  7.85 (s, 1H), 7.07-7.80 (M, 7H), 5.91 (d, 1H,  $J$ = 7.3 Hz), 5.12 (d, 1H,  $J$ = 16.9 Hz), 5.12-5.22 (m, 1H), 4.87 (d, 1H,  $J$ = 15.8 Hz), 4.78 (d, 1H,  $J$ = 15.8 Hz), 3.90 (d, 1H,  $J$ = 17.2 Hz), 3.35 (dd, 1H,  $J_1$ = 14.2 Hz,  $J_2$ = 4.5 Hz), 2.90 (t, 1H,  $J$ = 14.2 Hz), 1.45 (s, 9H). <sup>13</sup>C NMR 63 MHz (CDCl<sub>3</sub>)  $\delta$  173.1, 155.4, 139.3, 134.7, 132.3, 131.8, 128.5, 127.9, 127.6, 122.8, 121.7, 120.9, 120.1, 118.3, 110.7, 109.8, 80.1, 51.4, 51.0, 45.2, 29.0, 28.4.

**Ac-(4S/R)-Aia-Gly-NMe-3',5'-(CF<sub>3</sub>)<sub>2</sub>Bn 28a/b:** Preparative HPLC yielded the desired compound with a yield of 52% (white powder). HPLC (standard gradient):  $t_{\text{Ret}}$  17.43 min; TLC  $R_f$  (EtOAc): 0.15; MS (ESP+) found  $m/z$  388  $[\text{M}+\text{H}]^+$ , 332  $[\text{M}+2\text{H}-t\text{Bu}]^+$ , 288  $[\text{M}+2\text{H}-\text{Boc}]^+$ , C<sub>26</sub>H<sub>24</sub>F<sub>6</sub>N<sub>4</sub>O<sub>3</sub> requires 554.2, <sup>1</sup>H NMR 250 MHz (CDCl<sub>3</sub>)  $\delta$  8.28 (s, 1H), 7.81 (s, 1H), 7.67 (s, 2H), 7.02-7.34 (M, 5H), 5.38 (m, 1H), 4.79 (d, 1H,  $J$ = 15.9 Hz), 4.79 (d, 1H,  $J$ = 15.9 Hz), 4.78 (d, 1H,  $J$ = 15.3 Hz), 4.47 (d, 1H,  $J$ = 15.3 Hz), 4.18 (d, 1H,  $J$ = 17.2 Hz), 4.06 (d, 1H,  $J$ = 15.9 Hz), 3.32 (dd, 1H,  $J_1$ = 15.70 Hz,  $J_2$ = 4.20 Hz), 2.98 (s, 3H), 2.80 (t, 1H,  $J$ = 12.60 Hz), 2.12 (s, 9H). <sup>13</sup>C NMR 125 MHz (CDCl<sub>3</sub>)  $\delta$  170.2, 168.6, 139.3, 134.6, 132.1, 131.9, 128.5, 127.8, 127.6, 122.9, 121.7, 120.8, 120.1, 118.3, 110.7, 109.8, 51.4, 50.7, 50.5, 46.9, 35.3, 28.6, 23.6.

**Ac-(4S/R)-Tcc-NMe-3',5'-(CF<sub>3</sub>)<sub>2</sub>Bn 32a/b:** Preparative HPLC yielded the desired compound (white powder, 66%). HPLC (standard gradient):  $t_{\text{Ret}}$  15.97 min; TLC  $R_f$  (EtOAc): 0.27; MS (ESP+) found  $m/z$  498  $[\text{M}+\text{H}]^+$ , 241  $[\text{M}-\text{NMeCH}_2\text{C}_6\text{H}_4(\text{CF}_3)_2]^+$ , C<sub>24</sub>H<sub>21</sub>F<sub>6</sub>N<sub>3</sub>O<sub>2</sub> requires 497.2, <sup>1</sup>H NMR 250 MHz (CDCl<sub>3</sub>)  $\delta$  7.99 (s, 1H), 7.77 (s, 1H), 7.56 (s, 2H), 7.12-7.49 (M, 5H), 5.11 (d, 1H,  $J$ = 14.6 Hz), 4.81 (d, 1H,  $J$ = 14.9 Hz), 4.75 (d, 2H,  $J$ = 15.6 Hz), 4.47 (d, 1H,  $J$ = 15.6 Hz), 3.30 (dd, 1H,  $J_1$ = 15.90 Hz,  $J_2$ = 7.30 Hz), 3.23 (s, 3H), 3.20 (t, 1H,  $J$ = 15.9 Hz), 2.37 (s, 3H). <sup>13</sup>C NMR 125 MHz (CDCl<sub>3</sub>)  $\delta$  173.7, 172.6, 139.1, 136.6, 128.2, 127.5, 126.8, 126.3, 124.1, 122.4, 121.9, 121.6, 119.9, 117.8, 111.0, 104.5, 51.0, 48.4, 43.4, 35.7, 22.7, 21.8.

**Ac-(4S)-Aia-3',5'-(CF<sub>3</sub>)<sub>2</sub>Bn 30:** Preparative HPLC gave the desired compound with a yield of 65% (white powder).. HPLC (standard gradient):  $t_{\text{Ret}}$  15.99 min; TLC  $R_f$  (EtOAc): 0.18; MS (ESP+) found  $m/z$  484  $[M+H]^+$ ,  $C_{23}H_{19}F_6N_3O_2$  requires 483.2,  $^1H$  NMR 250 MHz ( $CDCl_3$ )  $\delta$  8.02 (s, 1H), 7.72 (s, 1H), 7.56 (s, 2H), 7.33 (s, 1H,  $J= 6.9$  Hz), 7.02-7.27 (M, 4H), 5.34-5.36 (m, 1H), 4.99 (d, 1H,  $J= 17.0$  Hz), 4.88 (d, 1H,  $J= 15.7$  Hz), 4.72 (d, 1H,  $J= 15.7$  Hz), 3.95 (d, 1H,  $J= 17.1$  Hz), 3.30 (dd, 1H,  $J_1= 15.6$  Hz,  $J_2= 4.3$  Hz), 2.84 (t, 1H,  $J= 14.2$  Hz), 2.21 (s, 3H).  $^{13}C$  NMR 63 MHz ( $CDCl_3$ )  $\delta$  172.6, 171.6, 138.8, 134.7, 132.6, 132.3, 132.0, 131.8, 128.1, 127.7, 126.2, 124.0, 122.9, 121.9, 120.2, 119.7, 118.2, 116.0, 113.7, 110.8, 109.0, 51.5, 50.3, 45.1, 28.1, 22.8.

**Figure S1:** SP-induced aequorin luminescence in the presence of antagonists **19**, **20** and **23**.

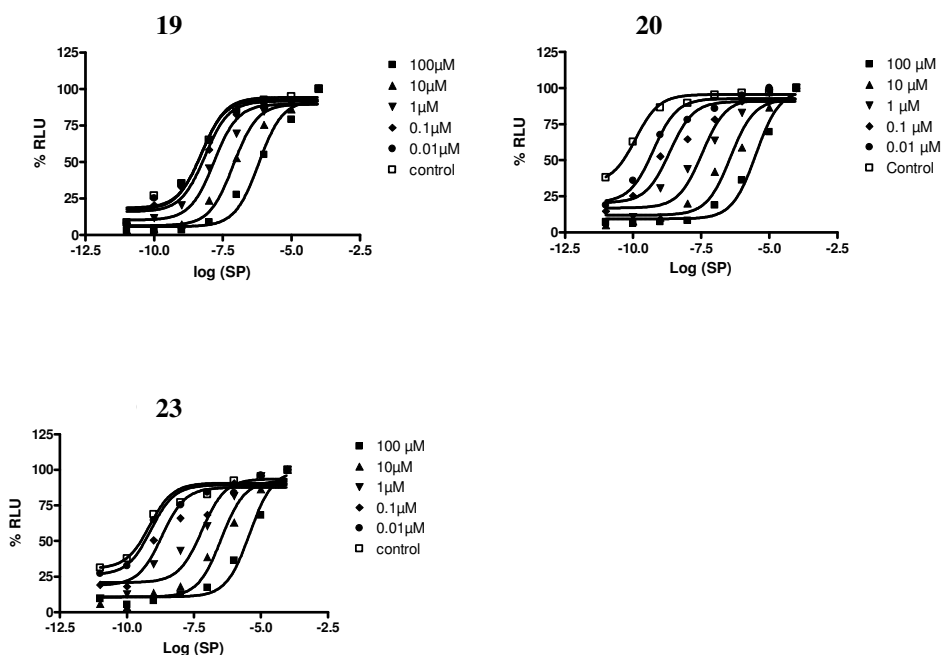

Agonist (substance P) induced bioluminescence data were obtained by means of an aequorin-based functional assay on NK1R-expressing CHO cells, in the absence (control) or presence of antagonist (compounds **23**, **19** and **20** were tested at concentrations ranging from  $10^{-8}$  to  $10^{-4}$  M, *cf.* the legend to the right of each graph). Substance P (SP) concentrations are indicated in a logarithmic scale on the X-axis. Data are expressed as a percentage of the maximal luminescence (% RLU, relative light units) which was obtained with  $10^{-4}$  M SP in the absence of any antagonist. Increasing antagonist concentrations clearly result in a rightward shift of the dose-response curve for SP, indicating that all three compounds act as competitive antagonists of the NK1 receptor.
